# Supplementary material for: Isolation of cubic Si3P4 in the form of nanocrystals
Source: publisher site journal article supplement (doi:10.3762/bjnano.14.80), 2023-09-26
Supplement: Additional file 1 [file 2190-4286-14-80-S1.pdf]

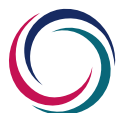

## Supporting Information

for

### Isolation of cubic $\text{Si}_3\text{P}_4$ in the form of nanocrystals

Polina K. Nikiforova, Sergei S. Bubenov, Vadim B. Platonov, Andrey S. Kumskov,  
Nikolay N. Kononov, Tatyana A. Kuznetsova and Sergey G. Dorofeev

*Beilstein J. Nanotechnol.* **2023**, *14*, 971–979. [doi:10.3762/bjnano.14.80](https://doi.org/10.3762/bjnano.14.80)

## Additional experimental data

Selected temperature for doping of Si NPs with phosphorus and the calculation of the diffusion constant resulted from the equation  $D = D_0 e^{\frac{-Q}{RT}}$ , where  $D_0=20 \text{ cm}^2/\text{sec}$ ,  $Q=364 \text{ kJ/mol}$ ,  $T=670^\circ\text{C}$  [1].

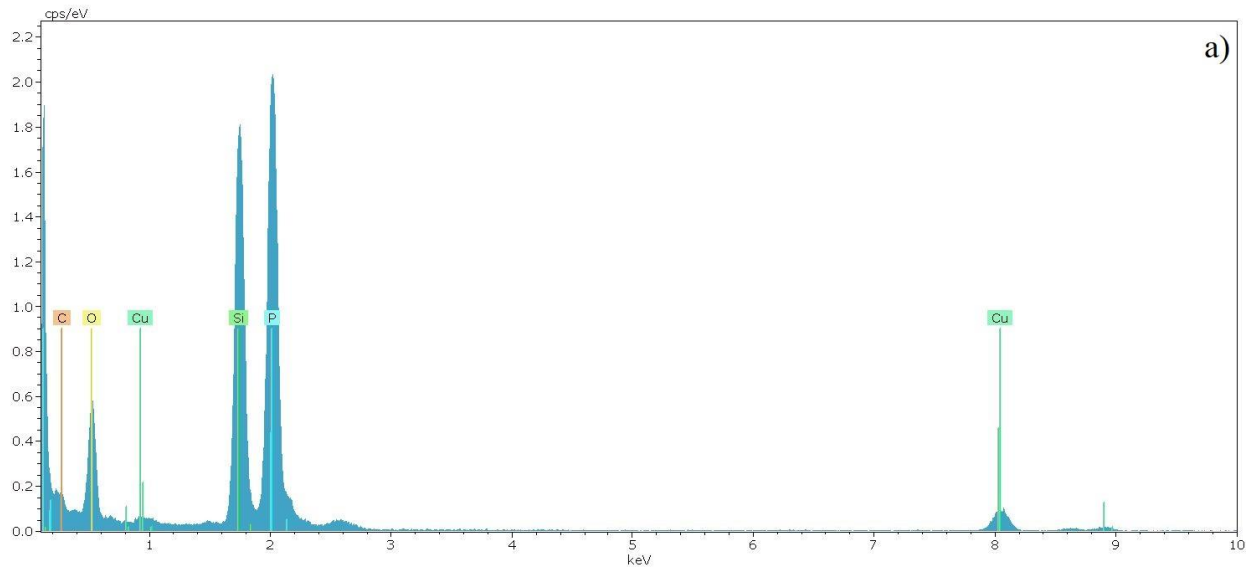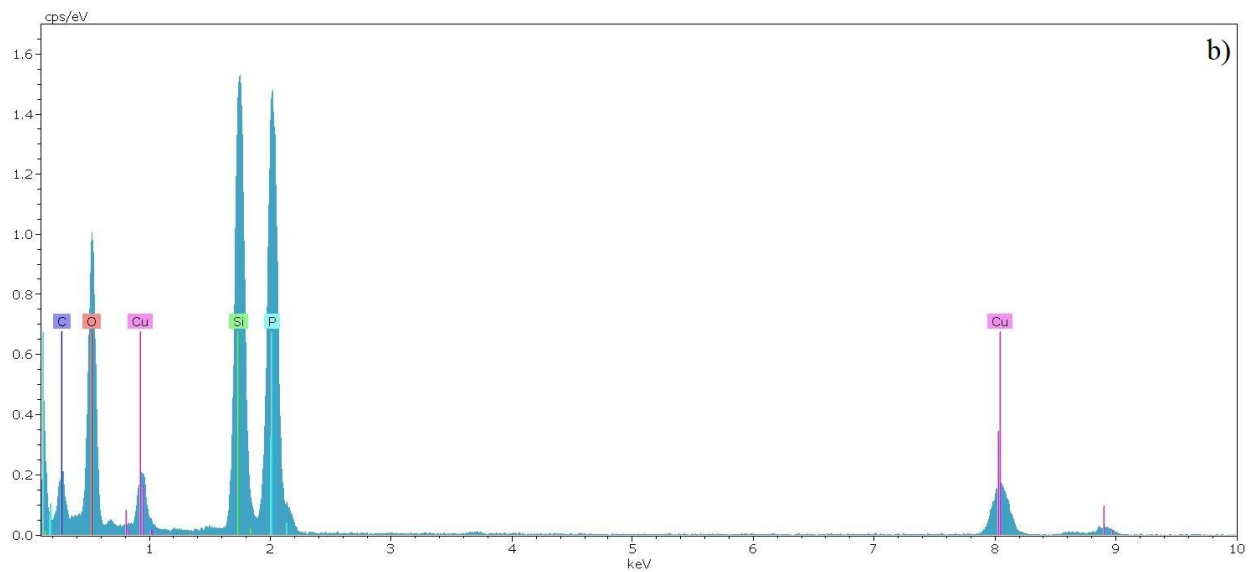

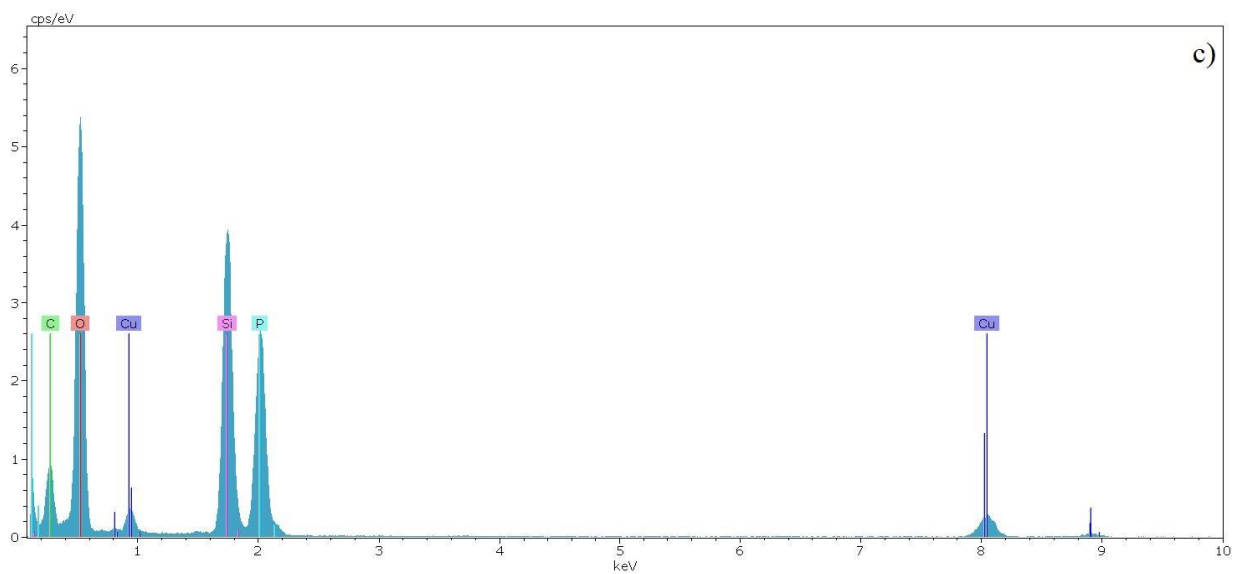

**Figure S1:** EDX spectra of (a),(b) – SP550, (c) – SP670.

**Table S1:** The correlation of bands and wavenumbers for Si NPs, hydrogenated Si NPs and SP400, SP670 and SP900 samples.

| Assignment                          | Wavenumber, cm <sup>-1</sup> |        |                     |                    |       |       |
|-------------------------------------|------------------------------|--------|---------------------|--------------------|-------|-------|
|                                     | Reference data               | Sample |                     |                    |       |       |
|                                     |                              | Si NPs | Hydrogenated Si NPs | SP400              | SP670 | SP900 |
| O-H stretching                      | 3700-3200<br>[2]             | 3420   | 3509<br>3450        | -                  | 3450  | 3329  |
| =C-H stretching                     | 3100-3000<br>[2]             | -      | -                   | 3073               | -     | -     |
| Methyl asymmetric C-H stretching    | 2960<br>[3]                  | 2960   | 2957                | 2956               | 2960  | 2956  |
| Methylene asymmetric C-H stretching | 2930<br>[2]                  | 2925   | 2924                | 2925               | 2926  | 2921  |
| Methylene symmetric C-H stretching  | 2850<br>[2]                  | 2854   | 2855                | 2853               | 2857  | 2853  |
| (O <sub>3</sub> )Si-H stretching    | 2250<br>[4]                  | 2267   | -                   | -                  | -     | 2266  |
| (Si <sub>3</sub> )Si-H stretching   | 2100<br>[4]                  | 2105   | 2107                | -                  | -     | -     |
| Overtone HRC=CH <sub>2</sub>        | 1850-1800<br>[3]             |        |                     | 1821               |       |       |
| C=O stretching                      | 1730<br>[2]                  | 1728   | 1711                | 1743-1730-<br>1718 | 1714  | 1720  |
| H <sub>2</sub> O deformation        | 1640<br>[5]                  | 1623   | 1631                | -                  | 1646  | 1641  |
| C=C stretching                      | 1680-1600<br>[2]             | -      | -                   | 1642               | -     | -     |
| Methylene scissoring                | 1465<br>[2]                  | 1465   | 1466                | 1466               | 1469  | 1465  |
| Methyl symmetrical C-H bending      | 1380<br>[2]                  | -      | -                   | 1378               | -     | -     |

|                                    |                       |              |              |              |              |              |
|------------------------------------|-----------------------|--------------|--------------|--------------|--------------|--------------|
| Methylene twisting                 | 1300<br>[2]           | -            | -            | 1302         | -            | -            |
| Si-O-Si stretching                 | 1200-1000<br>[2], [6] | 1208<br>1069 | 1167<br>1072 | 1186<br>1098 | 1205<br>1090 | 1183<br>1073 |
| C-H deformation non-planar (vinyl) | 995-985<br>[3]        | -            | -            | 992          | -            | -            |
| C-H deformation non-planar (vinyl) | 915-905<br>[3]        | -            | -            | 911          | -            | -            |
| H-Si-O <sub>3</sub> deformation    | 880<br>[6]            | 880          | -            | -            | -            | 874          |
| H-Si-O <sub>2</sub> deformation    | 850<br>[6]            | -            | 863          | -            | -            | -            |
| Si-O-Si symmetrical stretching     | 810<br>[7]            | 804          | 814          | 806          | 801          | 806          |
| Methylene rocking                  | 720<br>[2]            | -            | 720          | 721          | -            | -            |
| =C-H out-of-plane bending          | 1000-600<br>[2]       | -            | -            | 668          | -            | -            |
| Si-Si-H <sub>x</sub> deformation   | 637<br>[6]            | 633          | -            | -            | -            | -            |
| Si-P stretching                    | -                     | -            | -            | 494          | 492          | 490          |
| Si-O-Si rocking                    | 450<br>[7]            | 452          | -            | -            | -            | -            |

## REFERENCES

[1] Babichev, A.P.; Babushkina, N.A.; Bratkovsky, A.M. Physical quantities. In *Diffusion*; Grigoriev, I.S.; Meilikhov, E.Z., Eds.; Energoatomizdat: Moscow, 1991; pp 375–390.

[2] Stuart, B. H. *Infrared Spectroscopy: Fundamentals and Applications*; John Wiley & Sons: Hoboken, N.J., 2004.

- [3] Tarasevich, B. N. *IR Spectra of Main Classes of Organic Compounds*; Moscow State University: Moscow, 2012.
- [4] Matsumoto, K.; Inada, M.; Umezu, I.; Sugimura, A. *Jpn. J. Appl. Phys.* **2005**, *44*, No. 12, 8742–8746.
- [5] Mendelovici, E.; Villalba, R.; Sagarzazu, A.; Carias, O. *Clay Miner.* **1995**, *30*, 307–313.
- [6] Zhou, S.; Pi, X.; Ni, Z.; Ding, Y.; Jiang, Y.; Jin, C.; Delerue, C.; Yang, D.; Nozaki, T. *ACS Nano* **2015**, *9*, No. 1, 378–386.
- [7] Gunde, M.K. *Physica B* **2000**, *292*, 286–295.
